# Supplementary material for: Does an Invasive Bivalve Outperform Its Native Congener in a Heat Wave Scenario? A Laboratory Study Case with Ruditapes decussatus and R. philippinarum
Source: MDPI journal article supplement (doi:10.3390/biology10121284), 2021-12-07
Supplement: s1 [file s1]

# Does an Invasive Bivalve Outperform Its Native Congener in a Heat Wave Scenario? A Laboratory Study Case with *Ruditapes decussatus* and *R. philippinarum*

*Supplemental material: Statistical significance and minimal adequate model summaries*

**Daniel Crespo<sup>1,2,3,\*</sup>, Sara Leston<sup>2</sup>, Lénia D. Rato<sup>1</sup>, Filipe Martinho<sup>2</sup>, Sara C. Novais<sup>1</sup>, Miguel A. Pardal<sup>2</sup> and Marco F.L. Lemos<sup>1,\*</sup>**

<sup>1</sup> MARE—Marine and Environmental Sciences Centre, ESTM, Polytechnic of Leiria, 2520-641 Peniche, Portugal; lenia.rato@ipleiria.pt (L.R.); sara.novais@ipleiria.pt (S.C.N.)

<sup>2</sup> CFE - Centre for Functional Ecology—Science for People & the Planet, Department of Life Sciences, University of Coimbra, Calçada Martim de Freitas, 3000-456 Coimbra, Portugal; saraleston@ci.uc.pt (S.L.); fmdm@ci.uc.pt (F.M.); mpardal@uc.pt (M.A.P.)

<sup>3</sup> CIIMAR—Interdisciplinary Centre of Marine and Environmental Research, University of Porto, Terminal de Cruzeiros do Porto de Leixões, Avenida General Norton de Matos, S/N, 4450-208 Matosinhos, Portugal

\* Correspondence: daniel.crespo@ipleiria.pt (D.C.); marco.lemos@ipleiria.pt (M.F.L.L.)

## 1) Statistical significance tables

**Table S1.** Summary of significant terms found in the generalised least squares models, using bioturbation components and nutrient concentrations as dependent variables and temperature treatment and species as explanatory variables.

| Dependent variable        | Significant terms | df | L-ratio | p    |
|---------------------------|-------------------|----|---------|------|
| Particle reworking        |                   |    |         |      |
| SBR                       | -                 | -  | -       | -    |
| f-SPI <sub>L</sub> mean   | Species           | 2  | 11.074  | .004 |
| f-SPI <sub>L</sub> median | Species           | 2  | 12.528  | .002 |
| f-SPI <sub>L</sub> max    | -                 | -  | -       | -    |
| Nutrients                 |                   |    |         |      |
| NH <sub>3</sub> -N        | -                 | -  | -       | -    |
| PO <sub>4</sub> -P        | -                 | -  | -       | -    |

**Table S2.** Summary of significant terms found in the generalised least squares models, using the normalised subcellular and biochemical responses and the Integrated Biological Response (version 2) as dependent variables, and species (*Ruditapes decussatus* and *R. philippinarum*) and temperature (constant temperature and heat wave) as explanatory variables.

| Dependent variable         | Significant terms     | df | L-ratio | p     |
|----------------------------|-----------------------|----|---------|-------|
| Oxidative stress           |                       |    |         |       |
| SOD activity               | -                     | -  | -       | -     |
| CAT activity               | Species               | 2  | 8.852   | .012  |
| DNAd                       | Species               | 2  | 19.294  | 1e-04 |
| LPO                        | Species               | 2  | 13.734  | .001  |
| Energy metabolism          |                       |    |         |       |
| IDH activity               | Species               | 2  | 7.158   | .028  |
| LDH activity               | -                     | -  | -       | -     |
| Energy allocation          |                       |    |         |       |
| ETS activity               | Species x Temperature | 1  | 4.305   | .038  |
| Lipid content              | Species x Temperature | 1  | 5.539   | .019  |
| Carbohydrate content       | -                     | -  | -       | -     |
| Protein content            | Species               | 2  | 13.943  | 9e-04 |
| Energy available           | Species               | 2  | 11.336  | .004  |
| Cellular energy allocation | Species x Temperature | 1  | 8.508   | .004  |
| Integrative index          |                       |    |         |       |
| IBR_V2                     | Temperature           | 2  | 7.961   | .019  |

## 2) Minimal adequate models and coefficient estimations

### *Bioturbation*

#### - **Model S1:** Mean Luminophore Depth ( $f^{SPI}L_{mean}$ )

$$f^{SPI}L_{mean} = f(species)$$

The minimal adequate model was a linear regression model with a GLS extension (*varIdent* variance structure), with *species* as variance covariate.

Minimal adequate model coefficient estimations for  $f^{SPI}L_{mean}$

|                                    | Value | S.E.  | t-value | p-value |
|------------------------------------|-------|-------|---------|---------|
| Intercept ( <i>R. decussatus</i> ) | 0.957 | 0.167 | 5.742   | 0.000   |
| <i>R. philippinarum</i>            | 1.178 | 0.321 | 0.321   | 0.003   |

#### - **Model S2:** Median Luminophore Depth ( $f^{SPI}L_{median}$ )

$$f^{SPI}L_{median} = f(species)$$

The minimal adequate model was a linear regression model with a GLS extension (*varIdent* variance structure), with *species* as variance covariate.

Minimal adequate model coefficient estimations for  $f^{SPI}L_{median}$

|                                    | Value | S.E.  | t-value | p-value |
|------------------------------------|-------|-------|---------|---------|
| Intercept ( <i>R. decussatus</i> ) | 0.673 | 0.127 | 5.302   | 0.000   |
| <i>R. philippinarum</i>            | 1.407 | 0.301 | 4.677   | 0.000   |

*Subcellular and biochemical responses*

**- Model S3: Catalase activity (CAT)**

$$CAT = f(\text{species})$$

The minimal adequate model was a linear regression model with a GLS extension (*varIdent* variance structure), with *species* as variance covariate.

Minimal adequate model coefficient estimations for CAT

|                                    | Value  | S.E.  | t-value | p-value |
|------------------------------------|--------|-------|---------|---------|
| Intercept ( <i>R. decussatus</i> ) | -8.557 | 3.704 | 2.310   | 0.026   |
| <i>R. philippinarum</i>            | 19.055 | 6.459 | 2.950   | 0.005   |

**- Model S4: DNA damage (DNAd)**

$$DNAd = f(\text{species})$$

The minimal adequate model was a linear regression model with a GLS extension (*varIdent* variance structure), with *species x temperature* as variance covariate.

Minimal adequate model coefficient estimations for DNAd

|                                    | Value    | S.E.   | t-value | p-value |
|------------------------------------|----------|--------|---------|---------|
| Intercept ( <i>R. decussatus</i> ) | 194.617  | 34.596 | 5.625   | 0.000   |
| <i>R. philippinarum</i>            | -211.927 | 39.176 | -5.410  | 0.000   |

- **Model S5:** Lipid peroxidation (LPO)

$$LPO = f(\text{species})$$

The minimal adequate model was a linear regression model with a GLS extension (*varIdent* variance structure), with *species x temperature* as variance covariate.

Minimal adequate model coefficient estimations for LPO

|                                    | Value   | S.E.  | t-value | p-value |
|------------------------------------|---------|-------|---------|---------|
| Intercept ( <i>R. decussatus</i> ) | 8.084   | 2.478 | 3.262   | 0.002   |
| <i>R. philippinarum</i>            | -24.954 | 5.718 | -4.364  | 0.000   |

- **Model S6:** Isocitrate dehydrogenase activity (IDH)

$$IDH = f(\text{species})$$

The minimal adequate model was a linear regression model with a GLS extension (*varIdent* variance structure), with *species x temperature* as variance covariate.

Minimal adequate model coefficient estimations for IDH

|                                    | Value   | S.E.   | t-value | p-value |
|------------------------------------|---------|--------|---------|---------|
| Intercept ( <i>R. decussatus</i> ) | -12.580 | 3.177  | -3.960  | 0.000   |
| <i>R. philippinarum</i>            | 32.356  | 12.138 | 2.666   | 0.011   |

**- Model S7: Electron transport system (ETS)**

$$ETS = f(\text{species} \times \text{temperature})$$

The minimal adequate model was a linear regression.

Minimal adequate model coefficient estimations for ETS; CT= constant temperature, HW= heat wave simulation

|                                       | Value   | S.E.   | t-value | p-value |
|---------------------------------------|---------|--------|---------|---------|
| Intercept ( <i>R. decussatus</i> ;CT) | 11.793  | 5.814  | 2.029   | 0.049   |
| <i>R. philippinarum</i>               | -35.275 | 7.923  | -4.452  | 0.000   |
| HW                                    | 9.914   | 8.623  | 1.150   | 0.257   |
| <i>R. philippinarum</i> x HW          | -24.350 | 11.995 | -2.030  | 0.049   |

**- Model S8: Lipid content**

$$\text{Lipid content} = f(\text{species} \times \text{temperature})$$

The minimal adequate model was a linear regression model with a GLS extension (*varIdent* variance structure), with *species* as variance covariate.

Minimal adequate model coefficient estimations for lipid content; CT= constant temperature, HW= heat wave simulation

|                                       | Value   | S.E.   | t-value | p-value |
|---------------------------------------|---------|--------|---------|---------|
| Intercept ( <i>R. decussatus</i> ;CT) | -11.466 | 10.280 | -1.115  | 0.271   |
| <i>R. philippinarum</i>               | -3.888  | 22.543 | -0.172  | 0.864   |
| HW                                    | -0.976  | 15.247 | -0.064  | 0.949   |
| <i>R. philippinarum</i> x HW          | 81.256  | 34.619 | 2.347   | 0.024   |

**- Model S9: Protein content**

$$\text{Protein content} = f(\text{species})$$

The minimal adequate model was a linear regression model with a GLS extension (*varIdent* variance structure), with *species* as variance covariate.

Minimal adequate model coefficient estimations for protein content

|                                    | Value   | S.E.  | t-value | p-value |
|------------------------------------|---------|-------|---------|---------|
| Intercept ( <i>R. decussatus</i> ) | 29.925  | 6.908 | 4.332   | 0.000   |
| <i>R. philippinarum</i>            | -31.643 | 7.645 | -4.139  | 0.000   |

**- Model S10: Energy available (EA)**

$$EA = f(\text{species})$$

The minimal adequate model was a linear regression model.

Minimal adequate model coefficient estimations for EA

|                                    | Value   | S.E.  | t-value | p-value |
|------------------------------------|---------|-------|---------|---------|
| Intercept ( <i>R. decussatus</i> ) | 20.424  | 4.623 | 4.418   | 0.000   |
| <i>R. philippinarum</i>            | -21.065 | 6.400 | -3.291  | 0.002   |

**- Model S11: Cellular energy allocation (CEA)**

$$CEA = f(\text{species} \times \text{temperature})$$

The minimal adequate model was a linear regression model with a GLS extension (*varIdent* variance structure), with *species x temperature* as variance covariate.

Minimal adequate model coefficient estimations for CEA; CT= constant temperature, HW= heat wave simulation

|                                       | Value   | S.E.   | t-value | p-value |
|---------------------------------------|---------|--------|---------|---------|
| Intercept ( <i>R. decussatus</i> ;CT) | 9.554   | 8.374  | 1.141   | 0.260   |
| <i>R. philippinarum</i>               | 3.449   | 10.814 | 0.319   | 0.751   |
| HW                                    | -14.864 | 9.553  | -1.556  | 0.127   |
| <i>R. philippinarum</i> x HW          | 65.143  | 20.601 | 3.162   | 0.003   |

**- Model S12: Integrated biological response, version 2 (IBR\_V2)**

$$IBR\_V2 = f(\text{temperature})$$

The minimal adequate model was a linear regression model.

Minimal adequate model coefficient estimations for IBR\_V2; CT= constant temperature, HW= heat wave simulation

|                | Value | S.E.  | t-value | p-value |
|----------------|-------|-------|---------|---------|
| Intercept (CT) | 8.544 | 0.368 | 23.229  | 0.000   |
| HW             | 1.602 | 0.558 | 2.872   | 0.006   |
